# Supplementary material for: A novel fluorescence–electrochemiluminescence dual-mode sensing platform for high-precision BRAF gene detection
Source: Royal Society of Chemistry journal article supplement (doi:10.1039/d3an02237d), 2024-01-01
Supplement: d3an02237d1.pdf [file d3an02237d1.pdf]

## Supporting Information

### **A novel fluorescence-electrochemiluminescence dual-mode sensing platform for high-precision BRAF gene detection**

Fengyao Yu<sup>a, #</sup>, Longyue Qin<sup>b, #</sup>, Hua Zhang<sup>a, \*</sup>, Longshua Qin<sup>a, \*</sup>, Hao Fan<sup>a, \*</sup>

<sup>a</sup> Department of Pharmacy, JiangXi University of Chinese Medicine, Nanchang, JiangXi 330004, China

<sup>b</sup> School of Materials Science and Engineering, Kunming University of Science and Technology, Kunming, YunNan 650031, China

# Fengyao Yu and Longyue Qin contributed equally to this paper.

\*Corresponding Author:

E-mail addresses: 2327476065@qq.com (Hua Zhang)

E-mail addresses: qinlongshua@163.com (Longshua Qin)

E-mail addresses: fanhao11@aliyun.com (Hao Fan)

**1. The synthesis of 2,5-dioxopyrrolidin-1-yl 3,5-bis((3,5-bisferrocenethoxybenzyl)oxy)benzoate.**

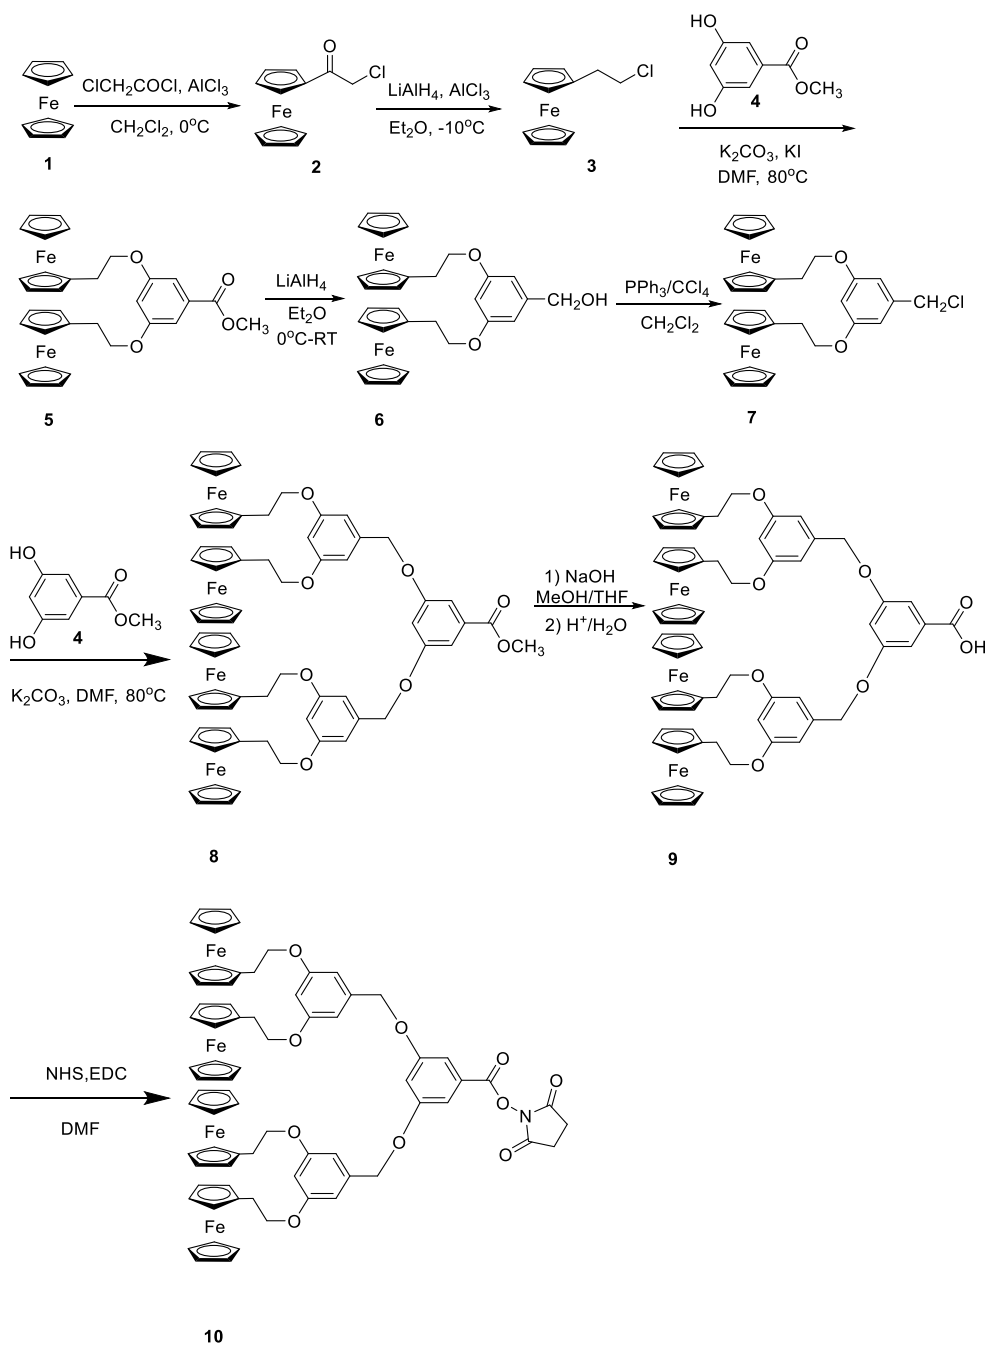

Scheme S1. The synthesis of 2,5-dioxopyrrolidin-1-yl 3,5-bis((3,5-bisferrocenethoxybenzyl)oxy)benzoate (10).

Procedures for the synthesis of 2,5-dioxopyrrolidin-1-yl 3,5-bis((3,5-bisferrocenethoxybenzyl)oxy)benzoate (10):

**$\alpha$ -chloroacetylferrocene (2).**

To a solution of ferrocene (11.2 g, 60 mmol) in dichloromethane (60 mL) at  $0^\circ\text{C}$ , a solution of chloroacetyl chloride (3.8 mL, 50 mmol) and anhydrous aluminum trichloride

(6.6 g, 50 mmol) in dichloromethane (80 mL) was added dropwise. After stirred for 8 h at room temperature, brine (100 mL) was added. The organic phase was separated and washed by brine. The resulting solution was dried over anhydrous Na<sub>2</sub>SO<sub>4</sub>, filtered and concentrated in vacuum. The residue was purified by flash column chromatography to give orange crystal in 41.5% yield. <sup>1</sup>H NMR (CDCl<sub>3</sub>, 600MHz): δ 4.88 (Cp-H, t, *J* = 2.0 Hz, 2 H), 4.62 (Cp-H, t, *J* = 2.0 Hz, 2 H), 4.46 (CH<sub>2</sub>, s, 2 H), 4.25 (Cp-H, s, 5 H).

### **2-Chloroethylferrocene (3).**

A solution of α-chloroacetylferrocene (1.2 g, 4.58 mmol) in Et<sub>2</sub>O (120 mL) was added dropwise to a solution of LiAlH<sub>4</sub> (180 mg, 4.7 mmol) and AlCl<sub>3</sub> (609 mg, 4.58 mmol) in Et<sub>2</sub>O (90 mL) at -10 °C. After 1 h, the reaction was carefully quenched by addition of H<sub>2</sub>O (20 mL) and diluted with brine (100 mL). The aqueous layer was extracted with ethyl acetate (3×50 mL). The combined organic layer was washed with brine (3×50 mL), dried over anhydrous sodium sulfate, and concentrated. The residue was purified by a silica gel column with ethyl acetate- Petroleum ether (1:15) as the eluent to afford yellow product (**3**) (0.76 g, 67%). <sup>1</sup>H NMR (CDCl<sub>3</sub>, 600 MHz) δ 4.16 (Cp-H, s, 7H), 4.13 (Cp-H, s, 2H), 3.62 (CH<sub>2</sub>-O, t, *J* = 7.2 Hz, 2H), 2.84 (Fc-CH<sub>2</sub>-, t, *J* = 7.2 Hz, 2H).

### **Methyl 3,5-bisferrocenethoxybenzoate (5).**

2-Chloroethylferrocene (548.1mg, 2.21 mmol), methyl 3,5-dihydroxybenzoate (154.6 mg, 0.92 mmol), anhydrous potassium carbonate (552 mg, 4 mmol) and potassium iodide (10 mg, 0.06 mmol) in DMF (4 mL) was mixed together and stirred at 80 °C until disappearance of starting material was observed by TLC. The mixture was diluted with ethyl acetate (80 mL) and washed with water (3×30 mL) and brine (3×30 mL). The organic phase was dried over anhydrous sodium sulfate and the solvent was removed in vacuum. The residue was purified by a silica gel column with ethyl acetate-petroleum ether as the eluent to gave (**5**) as yellow solid (398 mg, 73%). <sup>1</sup>H NMR (CDCl<sub>3</sub>, 600 MHz) δ 7.19 (Ar-H, s, 1H), 7.11 (Ar-H, d, *J* = 2.4 Hz, 2H), 4.09 (Cp-H, t, *J* = 1.5 Hz, 4H), 4.06 (Cp-H, s, 10H), 4.04-4.02 (Cp-H, -CH<sub>2</sub>-O, m, 8H), 3.82 (O-CH<sub>3</sub>, s, 3H), 2.75 (Fc-CH<sub>2</sub>-, t, *J* = 7.2 Hz, 4H). <sup>13</sup>C NMR (CDCl<sub>3</sub>, 150 MHz) δ 166.9, 159.9, 131.9, 107.7, 106.8, 84.6, 68.8, 68.6, 68.6, 67.5, 52.3, 29.5. HRMS (ESI) Calcd. for C<sub>32</sub>H<sub>32</sub>Fe<sub>2</sub>O<sub>4</sub> [M]<sup>+</sup>: 592.0999; found 592.0991.

### **(3, 5-bisferrocenethoxyphenyl)methanol (6).**

To a solution of LiAlH<sub>4</sub> (28.8 mg, 0.76 mmol) in anhydrous ether (10 mL), a solution of methyl 3, 5-bisferrocenethoxy-benzoate (50 mg, 0.084 mmol) in anhydrous ether (15 mL) was added dropwise at 0 °C. The mixture was stirred at room temperature until the disappearance of the starting material. And then the reaction was carefully quenched by H<sub>2</sub>O (20 mL), the aqueous layer was separated and extracted with diethyl ether (3×25 mL). The combined organic layer was washed with brine (3×50 mL), dried over anhydrous sodium sulfate, and concentrated. The residue was purified by flash column chromatography to give orange crystal (**6**). Yields: 89.0% . <sup>1</sup>H NMR (CDCl<sub>3</sub>, 600 MHz)

$\delta$  6.55 (Ar-H, s, 2H), 6.43 (Ar-H, s, 1H), 4.64 (ArCH<sub>2</sub>-O, s, 2H), 4.20-4.13 (Cp-H, m, 18H), 4.10 (-CH<sub>2</sub>-O, t,  $J$  = 7.2 Hz, 4H), 2.84 (Fc-CH<sub>2</sub>-, t,  $J$  = 7.2 Hz, 4H). HRMS (ESI) Calcd. for C<sub>31</sub>H<sub>32</sub>Fe<sub>2</sub>O<sub>3</sub> [M]<sup>+</sup>: 564.1050; found 564.1037.

### **3, 5-bisferrocenethoxybenzyl chloride (7).**

To a solution of PPh<sub>3</sub> (0.4313 g, 1.65 mmol) in CCl<sub>4</sub> (10 mL), a solution of (3, 5-bisferrocenethoxyphenyl)methanol (0.7739 g, 1.37 mmol) in CH<sub>2</sub>Cl<sub>2</sub> (10mL) was added dropwise. The mixture solution was refluxed for 30 min and observed by TLC. The mixture was diluted with dichloromethane (40 mL) and washed with water (3×20 mL) and brine (3×20 mL). The organic phase was dried over anhydrous sodium sulfate and concentrated. The residue was purified by a silica gel column with ethyl acetate-petroleum ether as the eluent to give (7) as dark orange solid. <sup>1</sup>H NMR (CDCl<sub>3</sub>, 600 MHz)  $\delta$  6.55 (Ar-H, d,  $J$  = 1.8 Hz, 2H), 6.43 (Ar-H, t,  $J$  = 2.4 Hz, 1H), 4.53 (ArCH<sub>2</sub>-O, s, 2H), 4.18 (Cp-H, t,  $J$  = 1.8 Hz, 4H), 4.15(Cp-H, s, 10H), 4.11 (Cp-H, t,  $J$  = 1.8 Hz, 4H), 4.09 (-CH<sub>2</sub>-O, t,  $J$  = 7.2 Hz, 4H), 2.83 (Fc-CH<sub>2</sub>-, t,  $J$  = 7.2 Hz, 4H). <sup>13</sup>C NMR (CDCl<sub>3</sub>, 150 MHz)  $\delta$  160.3, 139.5, 107.1, 101.3, 84.6, 68.7, 68.6, 68.6, 67.5, 46.2, 29.2. HRMS (ESI) Calcd. for C<sub>31</sub>H<sub>31</sub>ClFe<sub>2</sub>O<sub>2</sub> [M]<sup>+</sup>: 582.0711; found 582.0731.

### **Methyl 3, 5-bis(3, 5-bisferrocenethoxybenzyloxy)benzoate (8).**

To a solution of methyl 3,5-dihydroxybenzoate (6.6 mg, 0.039 mmol) and anhydrous K<sub>2</sub>CO<sub>3</sub> (21.5 mg, 0.156 mmol) in 10mL of DMF, 3, 5-bisferrocenethoxybenzyl chloride (50 mg, 0.085mmol) was added. The reaction was stirred at 80 °C under nitrogen atmosphere and observed by TLC. The mixture was diluted with ethyl acetate (30 mL) and washed with brine (3×15 mL). The organic phase was dried over anhydrous sodium sulfate and the solvent was removed in vacuum. The residue was purified by a silica gel column with ethyl acetate-petroleum ether as the eluent to give (8) as dark yellow solid. <sup>1</sup>H NMR (CDCl<sub>3</sub>, 600 MHz)  $\delta$  7.30 (Ar-H, d,  $J$  = 2.4 Hz, 2H), 6.82 (Ar-H, t,  $J$  = 2.4 Hz, 1H), 6.59 (Ar-H, d,  $J$  = 2.4 Hz, 4H), 6.45 (Ar-H, t,  $J$  = 2.4 Hz, 2H), 5.01 (ArCH<sub>2</sub>-O, s, 4H), 4.18 (Cp-H, t,  $J$  = 1.2 Hz, 8H), 4.15-4.09 (Cp-H and -CH<sub>2</sub>-O, m, 36H), 3.91 (-COOCH<sub>3</sub>, s, 3H), 2.83 (Fc-CH<sub>2</sub>-, t,  $J$  = 7.2 Hz, 8H).

### **3, 5-bis(3, 5-bisferrocenethoxybenzyloxy)benzoic acid (9).**

To a solution of methyl 3, 5-bis(3, 5-bisferrocenethoxybenzyloxy)benzoate (50 mg, 0.04 mmol) in THF/MeOH (10mL,v/v=1:1), 10% aqueous sodium hydroxide (2 mL) was added at room temperature. The mixture was kept stirring overnight, the pH was adjusted to about 5 with dilute hydrochloric acid. The resulting orange crystals were collected by filtration, washed with water, and dried under vacuum. A pure sample was obtained by recrystallization from dichloromethane/ petroleum ether to give (9) (32 mg, 65% yield, purity > 95%) as dark yellow solid. <sup>1</sup>H NMR (CDCl<sub>3</sub>, 600 MHz)  $\delta$  7.32 (Ar-H, s, 2H), 6.85 (Ar-H, s, 1H), 6.59 (Ar-H, s, 4H), 6.44 (Ar-H, s, 2H), 5.01 (ArCH<sub>2</sub>-O, s, 4H), 4.20-4.11 (Cp-H, m, 36H), 4.09 (-CH<sub>2</sub>-O, t,  $J$  = 7.2 Hz, 8H), 2.83 (Fc-CH<sub>2</sub>-, t,  $J$  = 6.6 Hz, 8H). HRMS (ESI) Calcd. for C<sub>69</sub>H<sub>66</sub>Fe<sub>4</sub>O<sub>8</sub> [M]<sup>+</sup>: 1246.2155; found 1246.2091.

### 2,5-dioxopyrrolidin-1-yl 3,5-bis((3,5-bisferrocenethoxybenzyl)oxy)benzoate (10).

To a solution of 3, 5-bis(3, 5-bisferrocenethoxybenzyloxy)benzoic acid (24.22 mg, 1.96 mmol) in DMF (3 mL), NHS (0.361 g, 3.14 mmol) and EDC (0.601 g, 3.14 mmol) was added at 0°C. The mixture was diluted with H<sub>2</sub>O (40 mL) and extracted with CH<sub>2</sub>Cl<sub>2</sub> (3×25 mL) after kept stirring overnight at room temperature. The organic phase was filtered and dried in vacuum to obtain (10) as light yellow solid. <sup>1</sup>H NMR (CDCl<sub>3</sub>, 400 MHz) δ 8.02 (Ar-H, s, 1H), 7.35 (Ar-H, s, 1H), 6.88 (Ar-H, s, 1H), 6.56 (Ar-H, s, 4H), 6.42 (Ar-H, s, 2H), 4.99 (ArCH<sub>2</sub>-O, s, 4H), 4.08-4.16 (Cp-H, m, 36H), 4.08 (-CH<sub>2</sub>-O, t, J = 8 Hz, 8H), 2.96 (CO-CH<sub>2</sub>-CH<sub>2</sub>-CO, s, 4H), 2.83 (Fc-CH<sub>2</sub>-, t, J = 6.6 Hz, 8H).

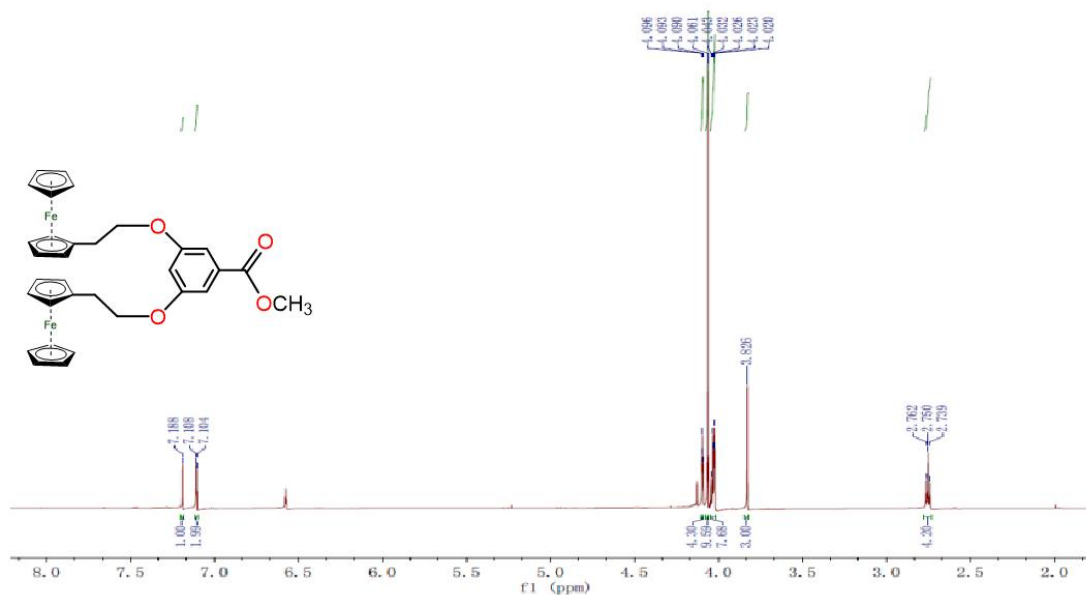

<sup>1</sup>H NMR of methyl 3,5-bisferrocenethoxybenzoate (5)

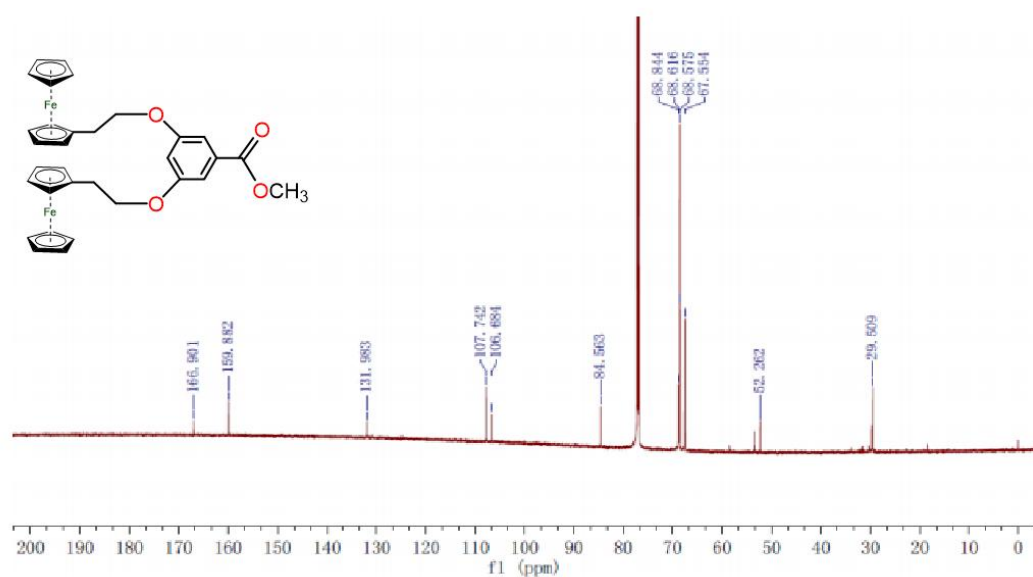

<sup>13</sup>C NMR of methyl 3,5-bisferrocenethoxybenzoate (5)

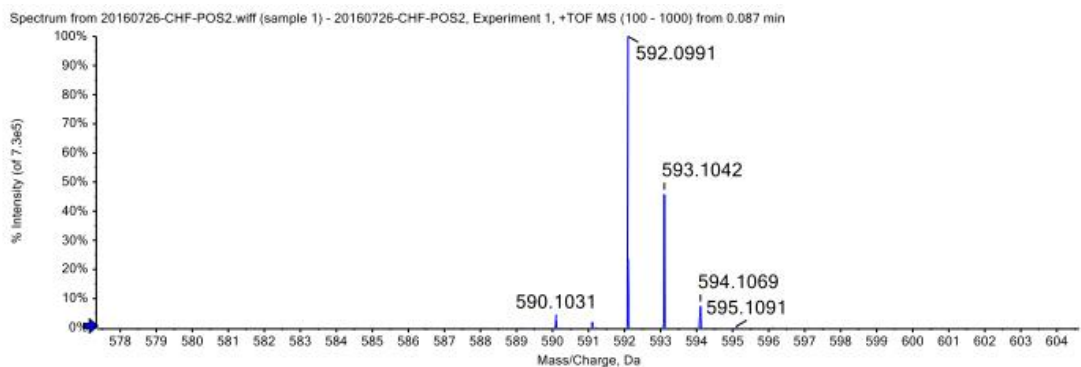

HRMS of methyl 3,5-bisferrocenethoxybenzoate (5)

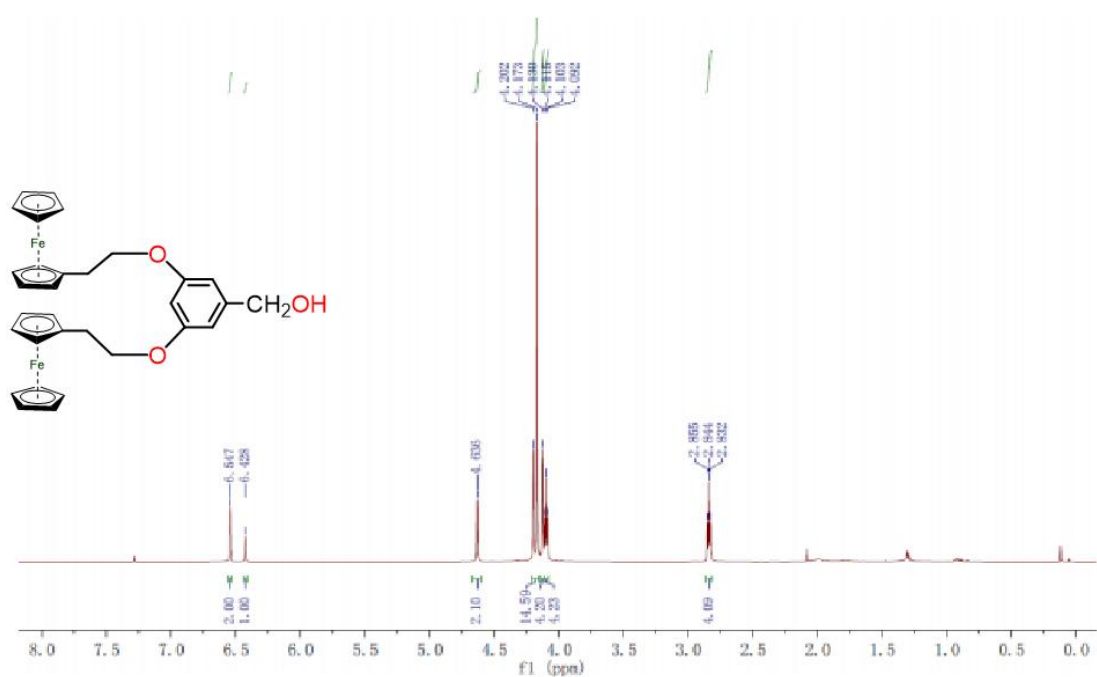

<sup>1</sup>H NMR of (3,5-bisferrocenethoxyphenyl)methanol (6)

Spectrum from 20161215-POS-H161209-1.wiff (samp...m 0.104 min, noise filtered, Gaussian smoothed)

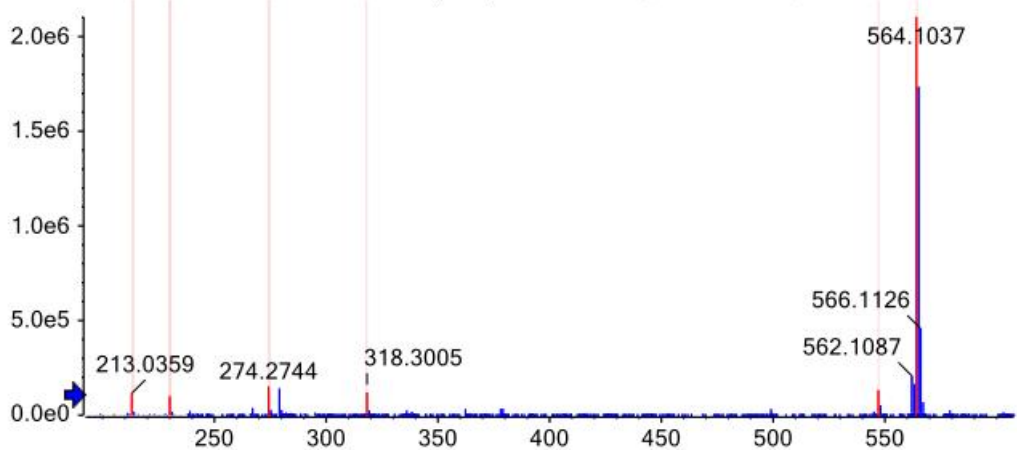

HRMS of (3,5-bisferrocenethoxyphenyl)methanol (6)

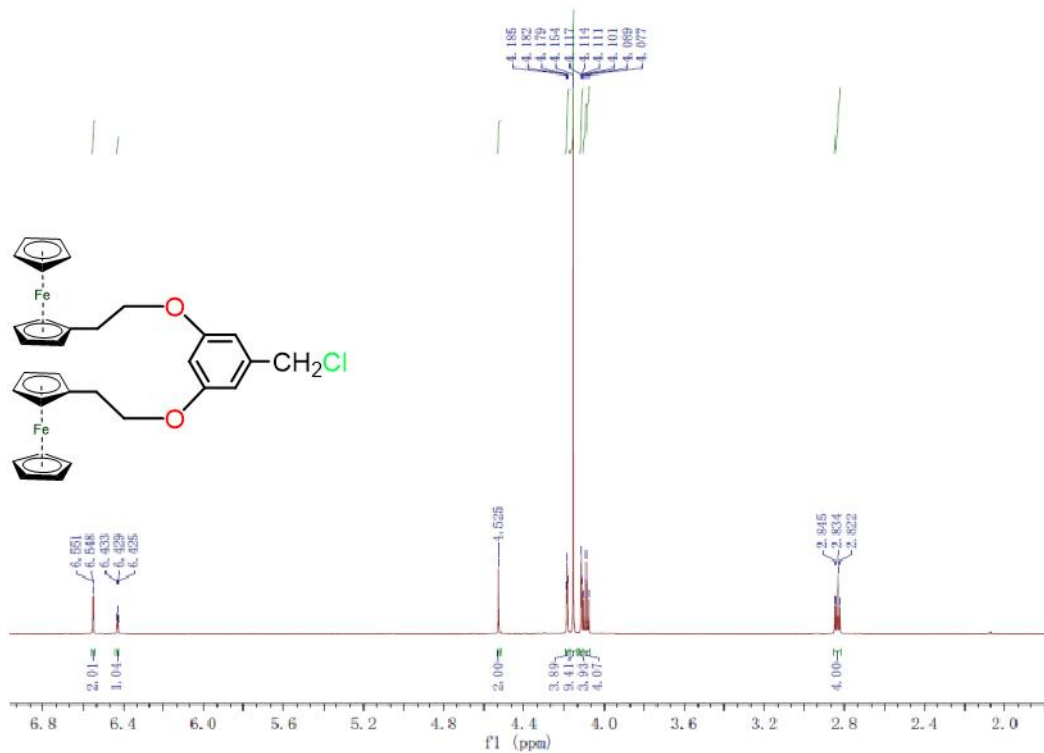

<sup>1</sup>H NMR of 3, 5-bisferrocenethoxybenzyl chloride (7)

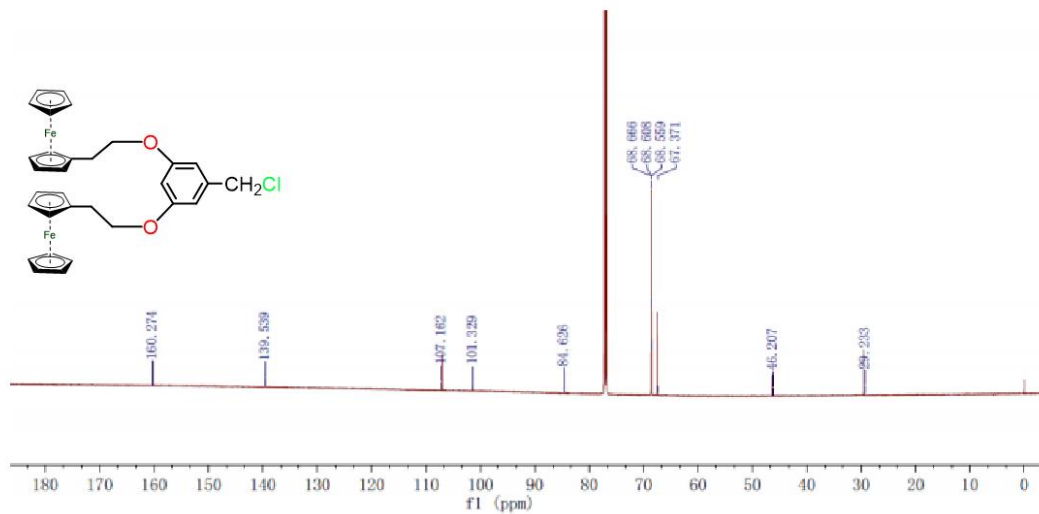

<sup>13</sup>C NMR of 3, 5-bisferrocenethoxybenzyl chloride (7)

Spectrum from 20170418-POS-H170414.wif..., +TOF MS (100 - 3000) from 0.101 min

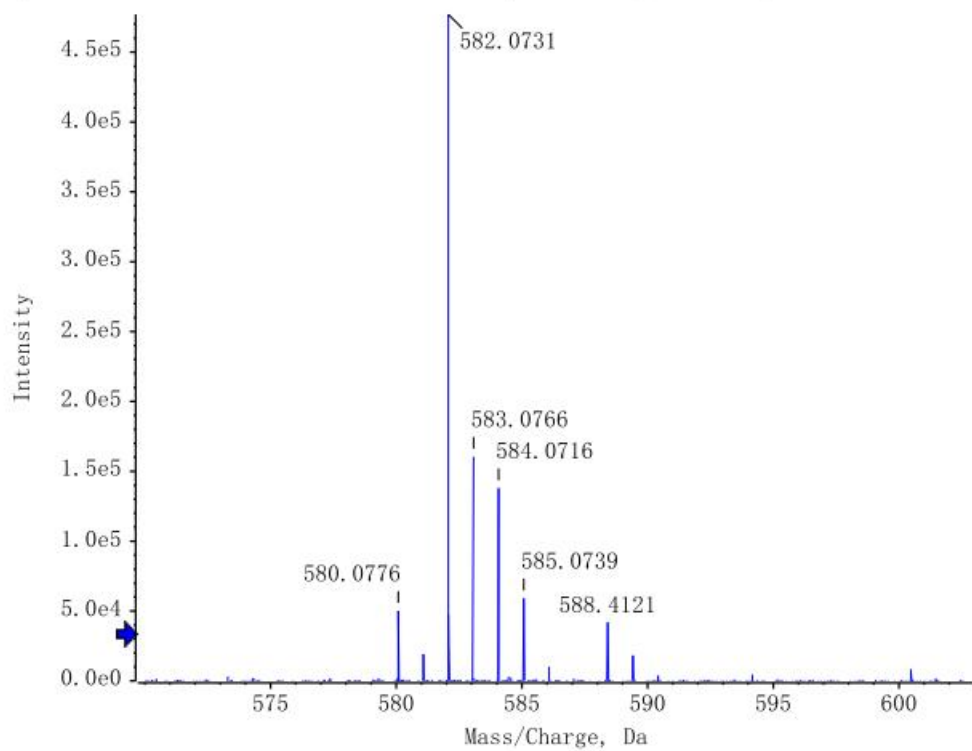

HRMS of 3, 5-bisferrocenethoxybenzyl chloride (7)

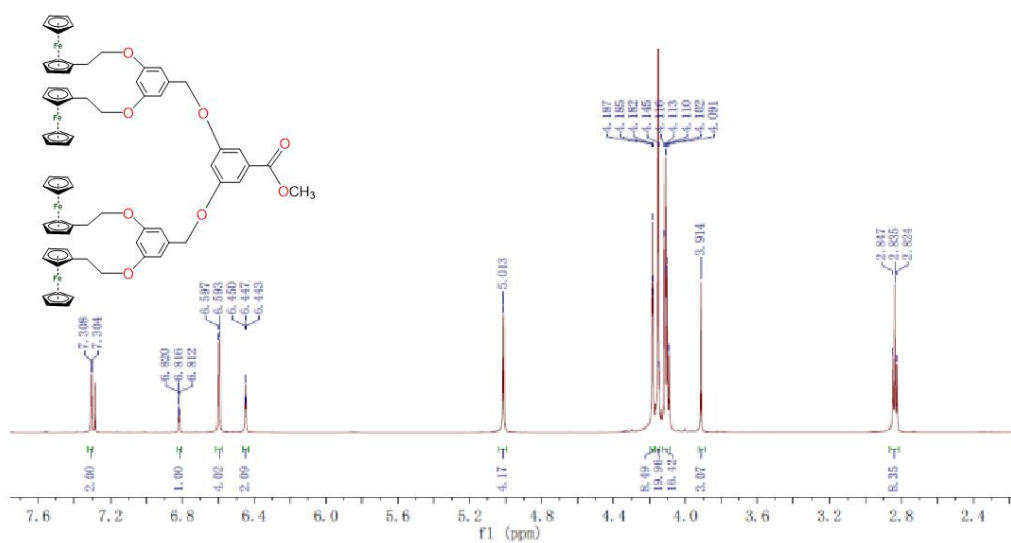

$^1\text{H}$  NMR of methyl 3, 5-bis(3, 5-bisferrocenethoxybenzyloxy)benzoate (8)



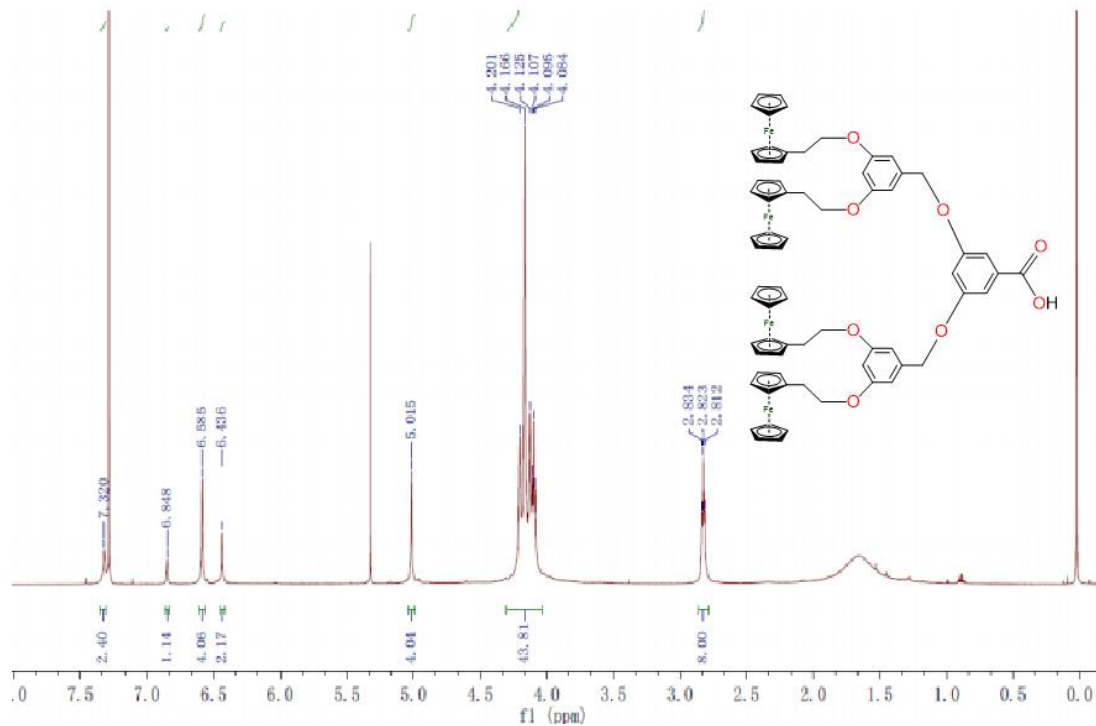

<sup>1</sup>H NMR of 3, 5-bis(3, 5-bisferrocenethoxybenzyloxy)benzoic acid (9)

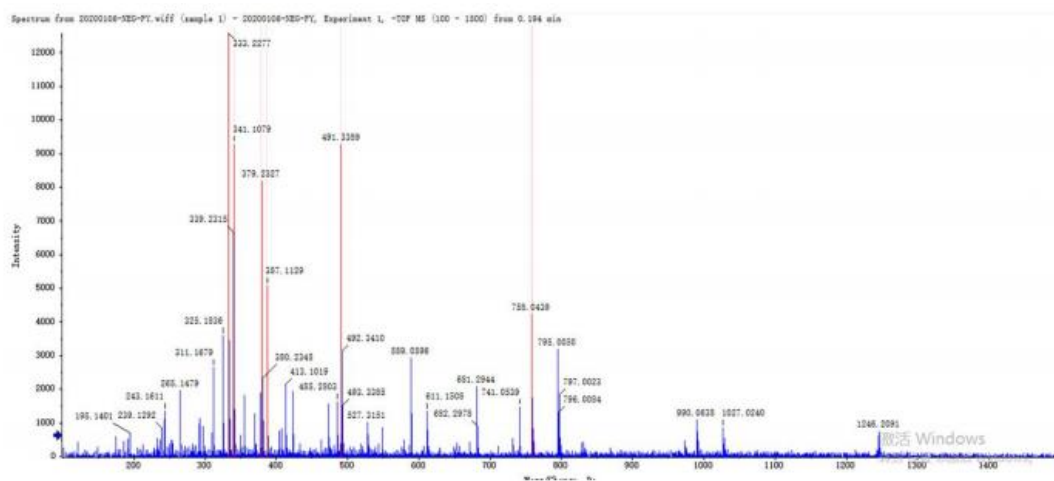

HRMS of 3, 5-bis(3, 5-bisferrocenethoxybenzyloxy)benzoic acid (9)

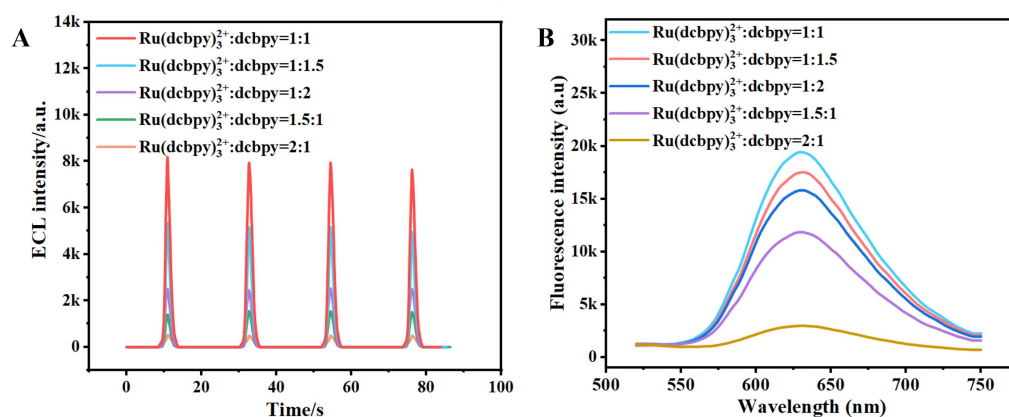

**Fig. S1.** FL (A) and ECL (B) intensity synthesized with different ratios of Ru(dcbpy)<sub>3</sub><sup>2+</sup> and dcbpy.

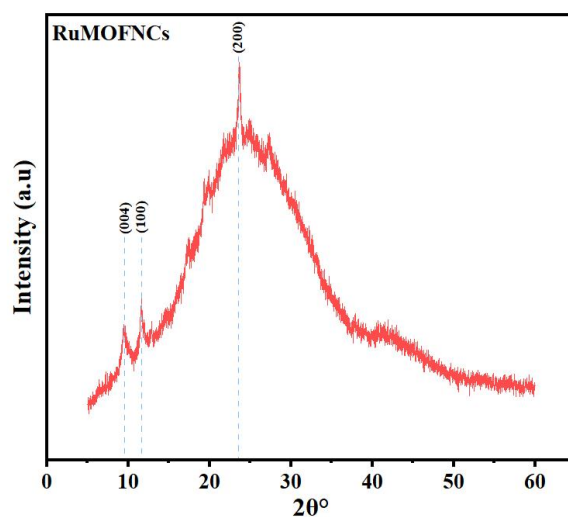

**Fig. S2.** X-ray Diffraction (XRD) plots of RuMOFNCs.

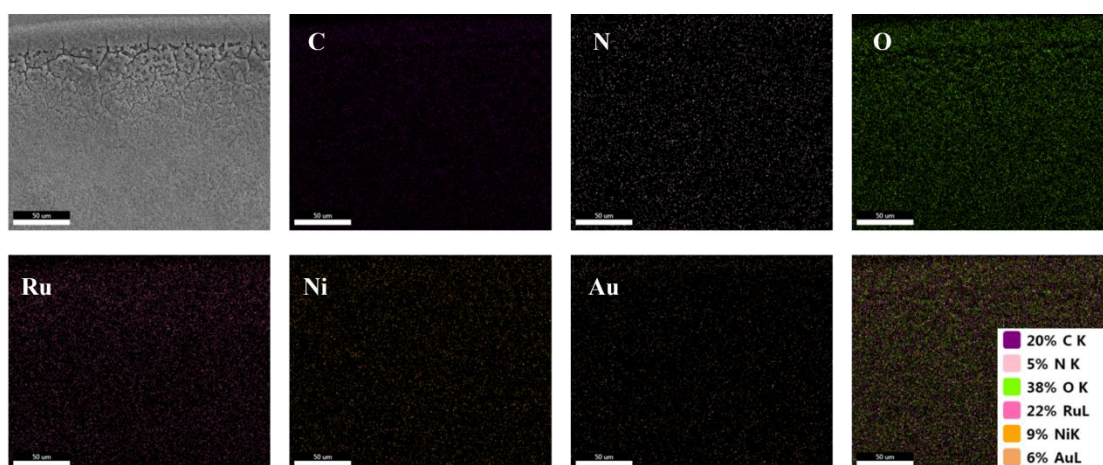

**Fig. S3.** The EDS spectrometer of RuMOFNCs@AuNPs, element mapping of C, N, O, Ru, Ni, Au, and sum spectrum.

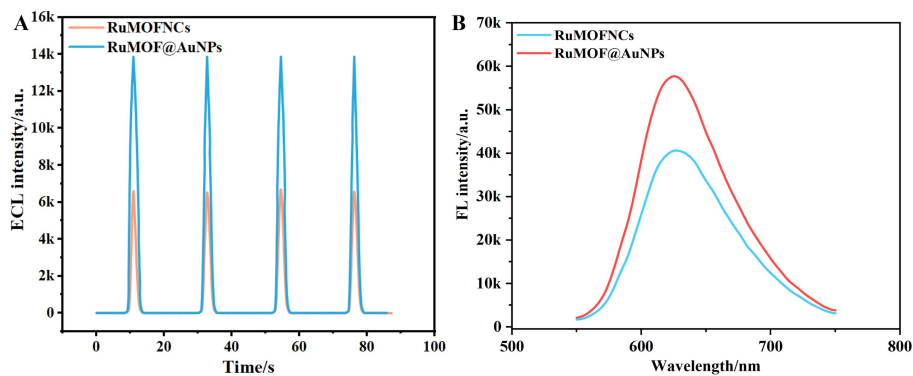

**Fig. S4.** AuNPs are modified to enhance the FL and ECL of RuMOFNCs based on the surface plasmon resonance effect.

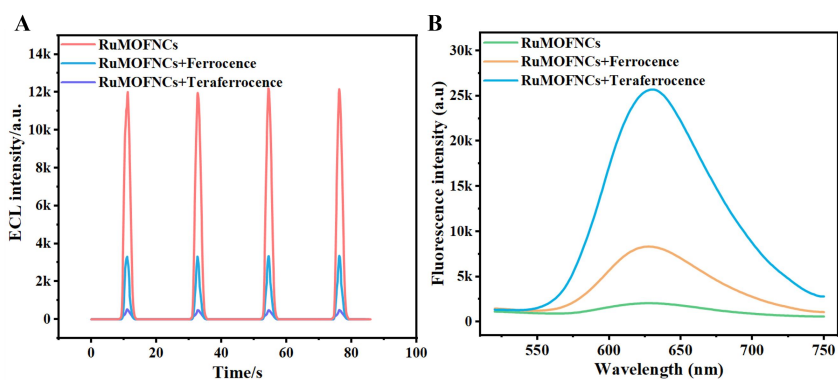

**Fig. S5.** FL and ECL quenching efficiency of RuMOFNCs by ferrocene and tetraferrocene.

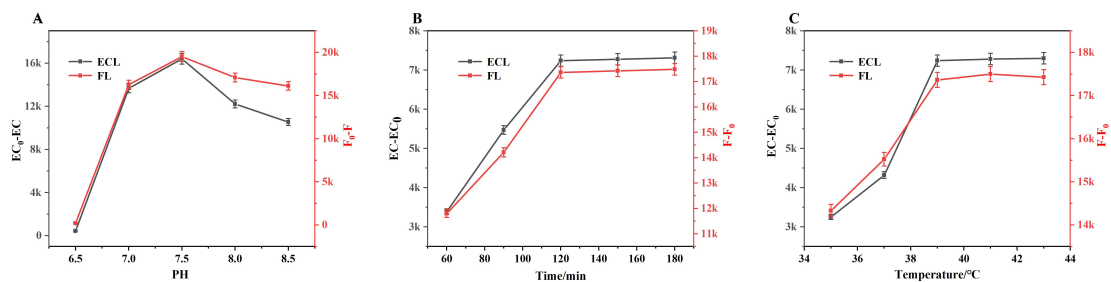

**Fig. S6.** Optimization of experimental conditions. pH of PBS (A), EXO III digestion time (B) and EXO III digestion temperature (C). Error bars = RSD (n = 6).

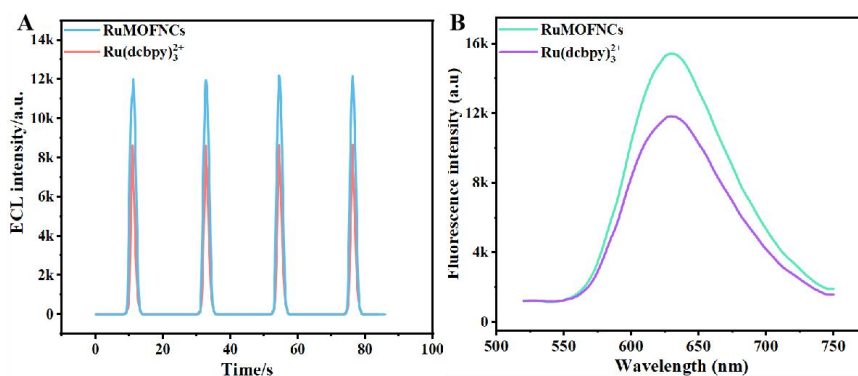

**Fig. S7.** The intensity comparison of ECL (A) and FL (B) of RuMOFNCs and Ru(dcbpy)<sub>3</sub><sup>2+</sup>.

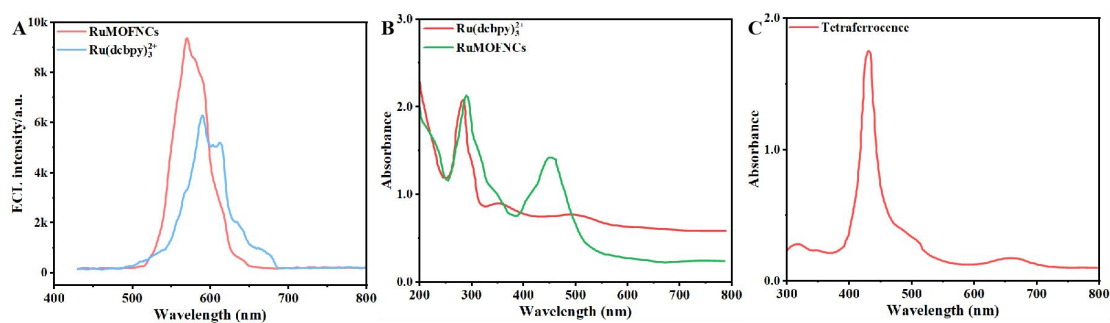

**Fig. S8.** The ECL spectra (A) and UV absorption spectra (B) of RuMOFNCs and Ru(dcbpy)<sub>3</sub><sup>2+</sup>. UV absorption spectrum of Tetraferrocene (C).

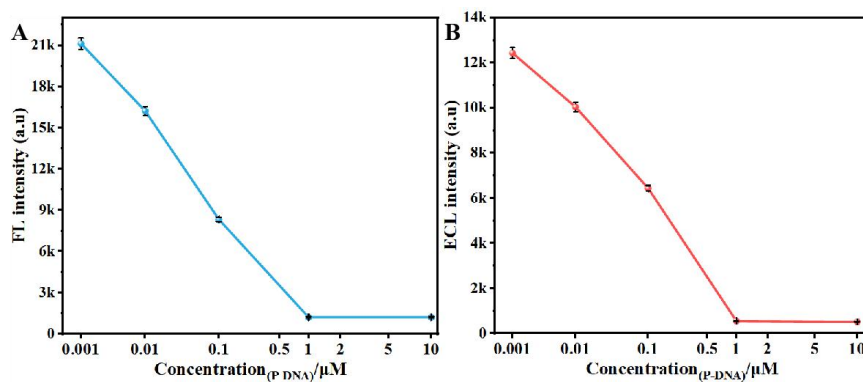

**Fig. S9.** Optimization of P-DNA modification in FL (A) and ECL sensing modes (B).

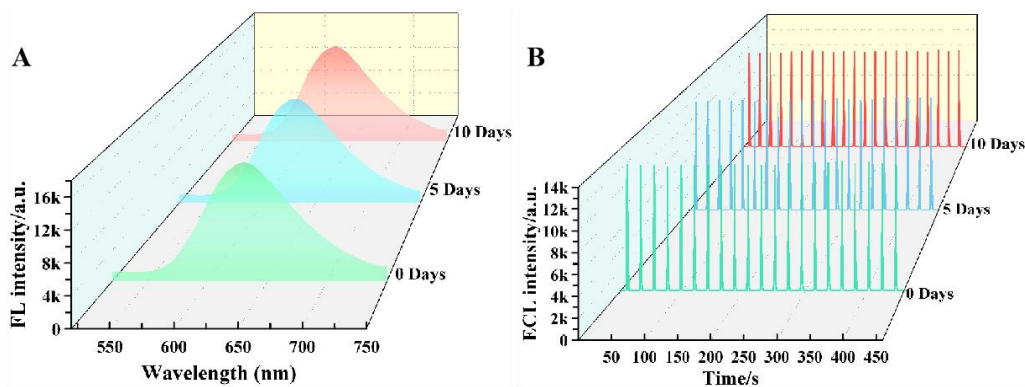

**Fig. S10.** Long-term stability tests in FL (A) and ECL sensing modes (B).

**Table S1.** Comparison of the various methods for detecting BRAF gene.

| Method   | Linear range   | Detection Limit | Ref.      |
|----------|----------------|-----------------|-----------|
| FL-ECL   | 0.1 fM~1 nM    | 10.3 aM         | This work |
|          | 0.01 fM~10 pM  | 3.1 aM          |           |
| FL       | 200 zM~2 pM    | 200 zM          | 1         |
| ECL      | 1 pM~1 nM      | 3.06 fM         | 2         |
| SPR-ECL  | 0.5 pM~2000 pM | 0.34 pM         | 3         |
| RCA-FRET | 75 fM~4.5 pM   | 60 ± 10 pM      | 4         |
| ECL      | 1 pM~1.5 nM    | 0.3 pM          | 5         |

**Table S2.** Recovery tests for BRAF gene in human serum samples.

| sample | Added(fM) | Measured (fM) |       | Recovery (%) |        | RSD (%) |      |
|--------|-----------|---------------|-------|--------------|--------|---------|------|
|        |           | FL            | ECL   | FL           | ECL    | FL      | ECL  |
| No.1   | 5         | 4.92          | 4.98  | 98.40        | 99.60  | 0.57    | 0.28 |
| No.2   | 10        | 10.12         | 10.21 | 101.2        | 102.10 | 0.42    | 1.47 |
| No.3   | 20        | 20.50         | 20.61 | 102.5        | 103.05 | 0.87    | 2.12 |

## Reference

1. L. Zhang, Y. Zhang, L. Huang, Y. Zhang, Y. Li, S. Ding and W. Cheng, *Sensors and Actuators B: Chemical*, 2019, **287**, 111-117.
2. Q. Zhang, Z. Liang, Y. Nie, X. Zhang and Q. Ma, *Mikrochim Acta*, 2020, **187**, 599.
3. E. Yang, Z. Ning, F. Yin, Z. Fang, M. Chen, M. Zhang, W. Xu, Y. Zhang and Y. Shen, *Sensors and Actuators B: Chemical*, 2022, **369**.
4. M. Dekaliuk, X. Qiu, F. Troalen, P. Busson and N. Hildebrandt, *ACS Sensors*, 2019, **4**, 2786-2793.
5. Y. Liu, M. Wang, Y. Nie, Q. Zhang and Q. Ma, *Anal Chem*, 2019, **91**, 6250-6258.
